# Supplementary material for: Efficacy and Safety of Brexpiprazole for the Treatment of Acute Schizophrenia: A 6-Week Randomized, Double-Blind, Placebo-Controlled Trial
Source: Atypon-hosted journal article supplement (doi:10.1176/appi.ajp.2015.14101275), 2015-04-17

## **Supplementary material**

### **Efficacy and safety of brexpiprazole for the treatment of acute schizophrenia: a 6-week, randomized, double-blind, placebo-controlled trial**

Christoph U. Correll, M.D.<sup>1</sup>, Aleksandar Skuban, M.D.<sup>2</sup>, John Ouyang, Ph.D.<sup>2</sup>, Mary Hobart, Ph.D.<sup>2</sup>, Stephanie Pfister, M.A., M.B.A.<sup>2</sup>, Robert D McQuade, Ph.D.<sup>2</sup>, Margaretta Nyilas, M.D.<sup>2</sup>, William H. Carson, M.D.<sup>2</sup>, Raymond Sanchez, M.D.<sup>2</sup>, Hans Eriksson, M.D.<sup>3</sup>

<sup>1</sup>The Zucker Hillside Hospital, Glen Oaks, NY, USA

<sup>2</sup>Otsuka Pharmaceutical Development & Commercialization, Inc., Princeton, NJ, USA

<sup>3</sup>H. Lundbeck A/S, Valby, Copenhagen, Denmark

**Table S1.** Number of patients with fasting metabolic parameters or prolactin measurements within the normal range at baseline and outside the normal range during the study (safety population)\*

|                                                                              | Number of patients:<br>Outside normal range during study <sup>a</sup> /normal at baseline |                   |                 |                 |
|------------------------------------------------------------------------------|-------------------------------------------------------------------------------------------|-------------------|-----------------|-----------------|
|                                                                              | Placebo<br>(n=184)                                                                        | Brexpiprazole     |                 |                 |
|                                                                              |                                                                                           | 0.25 mg<br>(n=90) | 2 mg<br>(n=182) | 4 mg<br>(n=180) |
| <b>Fasting metabolic parameters<sup>b</sup><br/>(baseline to last visit)</b> |                                                                                           |                   |                 |                 |
| Cholesterol; normal to high                                                  | 1/100                                                                                     | 2/45              | 3/92            | 3/95            |
| HDL cholesterol; normal to low                                               | 4/102                                                                                     | 1/56              | 0/106           | 4/119           |
| LDL cholesterol; normal to high                                              | 3/96                                                                                      | 0/47              | 4/94            | 2/102           |
| Triglycerides; normal to high                                                | 3/103                                                                                     | 2/56              | 6/112           | 8/117           |
| <b>Fasting glucose<sup>c</sup></b>                                           |                                                                                           |                   |                 |                 |
| Normal to high at last visit                                                 | 21/89                                                                                     | 9/42              | 14/91           | 15/100          |
| Normal to high at any visit                                                  | 4/127                                                                                     | 2/57              | 6/120           | 4/126           |
| Borderline to high at any visit                                              | 3/33                                                                                      | 3/21              | 3/39            | 3/30            |
| <b>Prolactin<sup>d</sup> (baseline to last visit)</b>                        |                                                                                           |                   |                 |                 |
| Female; normal to high                                                       | 2/28                                                                                      | 1/16              | 5/36            | 7/37            |
| Male; normal to high                                                         | 2/53                                                                                      | 1/31              | 5/51            | 9/57            |

<sup>a</sup>Baseline to last visit for fasting metabolic parameters and prolactin; baseline to any visit for glucose.

<sup>b</sup>Normal ranges: cholesterol 162–280 mg/dL; HDL cholesterol 27–67 mg/dL; LDL cholesterol 81–189 mg/dL; triglycerides 55–327 mg/dL.

<sup>c</sup>Glucose measurements: normal <100 mg/dL; borderline 100 to <126 mg/dL; high ≥126 mg/dL.

<sup>d</sup>Normal ranges: female 2.74–26.72 ng/mL; male 2.64–13.13 ng/mL.

\*The Fisher's exact test was used to test treatment difference for all parameters. There were no statistically significant differences between treatment groups.

**Table S2.** Mean change from baseline to the last visit in laboratory measurements (safety population)\*

| Assessment                         | Mean (SD) change from baseline to last visit |        |         |                   |       |        |                 |       |        |                 |       |        |
|------------------------------------|----------------------------------------------|--------|---------|-------------------|-------|--------|-----------------|-------|--------|-----------------|-------|--------|
|                                    | Placebo<br>(n=184)                           |        |         | Brexpiprazole     |       |        |                 |       |        |                 |       |        |
|                                    | n                                            | Mean   | SD      | 0.25 mg<br>(n=90) |       |        | 2 mg<br>(n=182) |       |        | 4 mg<br>(n=180) |       |        |
|                                    | n                                            | Mean   | SD      | n                 | Mean  | SD     | n               | Mean  | SD     | n               | Mean  | SD     |
| <b>Liver enzymes</b>               |                                              |        |         |                   |       |        |                 |       |        |                 |       |        |
| ALT, U/L                           | 167                                          | 0.08   | 27.91   | 84                | -1.08 | 12.80  | 173             | 1.93  | 14.54  | 167             | 3.56  | 19.61  |
| AST, U/L                           | 168                                          | 2.65   | 31.59   | 83                | 0.64  | 9.44   | 172             | 2.30  | 11.38  | 167             | 1.63  | 9.25   |
| Alkaline phosphatase, U/L          | 168                                          | -0.05  | 12.61   | 84                | 1.10  | 9.42   | 173             | -0.17 | 9.80   | 167             | 0.75  | 20.01  |
| Total bilirubin, mg/dL             | 166                                          | 0.04   | 0.25    | 80                | 0.02  | 0.21   | 169             | 0.04  | 0.21   | 162             | 0.00  | 0.22   |
| <b>Renal parameters</b>            |                                              |        |         |                   |       |        |                 |       |        |                 |       |        |
| CPK, U/L                           | 168                                          | 177.70 | 1910.15 | 84                | 62.56 | 300.53 | 173             | 83.80 | 658.22 | 167             | 69.72 | 283.68 |
| Creatinine, mg/dL                  | 168                                          | 0.01   | 0.10    | 84                | 0.00  | 0.10   | 173             | -0.02 | 0.12   | 167             | -0.01 | 0.11   |
| Urea nitrogen, mg/dL               | 168                                          | 0.31   | 3.41    | 84                | -0.32 | 3.26   | 173             | -0.08 | 3.63   | 167             | -0.45 | 3.57   |
| <b>Electrolytes</b>                |                                              |        |         |                   |       |        |                 |       |        |                 |       |        |
| Bicarbonate, mEq/L                 | 168                                          | -0.30  | 2.77    | 84                | 0.18  | 2.25   | 173             | 0.04  | 2.82   | 167             | -0.49 | 2.91   |
| Chloride, mEq/L                    | 168                                          | 0.02   | 2.75    | 84                | -0.26 | 2.83   | 173             | -0.12 | 2.81   | 167             | 0.22  | 2.72   |
| Potassium, mEq/L                   | 168                                          | -0.09  | 0.47    | 84                | -0.07 | 0.41   | 172             | -0.12 | 0.41   | 167             | -0.08 | 0.39   |
| Sodium, mEq/L                      | 168                                          | -0.24  | 2.72    | 84                | -0.37 | 2.78   | 173             | -0.31 | 2.67   | 167             | 0.11  | 2.57   |
| <b>Hematology</b>                  |                                              |        |         |                   |       |        |                 |       |        |                 |       |        |
| APTT, sec                          | 148                                          | 0.81   | 6.82    | 73                | 1.05  | 5.87   | 154             | 0.91  | 5.70   | 151             | 0.75  | 4.42   |
| PTT, sec                           | 148                                          | 0.22   | 1.57    | 75                | 0.34  | 1.43   | 154             | -0.02 | 1.71   | 151             | -0.03 | 0.86   |
| INR                                | 148                                          | 0.03   | 0.18    | 75                | 0.04  | 0.16   | 154             | -0.00 | 0.19   | 151             | 0.00  | 0.11   |
| Hematocrit, %                      | 163                                          | -0.34  | 2.94    | 81                | -0.09 | 2.95   | 172             | -0.40 | 2.80   | 166             | -0.43 | 3.21   |
| Hemoglobin, g/dL                   | 166                                          | -0.01  | 0.94    | 82                | -0.12 | 0.86   | 172             | -0.18 | 0.83   | 166             | -0.16 | 0.96   |
| HbA1c, %                           | 162                                          | 0.01   | 0.27    | 79                | 0.05  | 0.31   | 168             | 0.02  | 0.30   | 163             | 0.03  | 0.31   |
| Basophils, thousands/ $\mu$ L      | 166                                          | -0.00  | 0.04    | 82                | -0.01 | 0.03   | 172             | 0.01  | 0.04   | 166             | -0.00 | 0.04   |
| Eosinophils, thousands/ $\mu$ L    | 166                                          | -0.02  | 0.11    | 82                | -0.02 | 0.09   | 172             | -0.01 | 0.09   | 166             | 0.00  | 0.12   |
| Lymphocytes, thousands/ $\mu$ L    | 166                                          | -0.03  | 0.51    | 82                | -0.11 | 0.48   | 172             | -0.10 | 0.47   | 166             | -0.07 | 0.43   |
| Neutrophils, thousands/ $\mu$ L    | 166                                          | -0.05  | 1.79    | 82                | 0.20  | 1.52   | 172             | 0.32  | 1.78   | 166             | 0.08  | 1.73   |
| Red blood cells, millions/ $\mu$ L | 166                                          | -0.00  | 0.31    | 82                | -0.02 | 0.28   | 172             | -0.04 | 0.28   | 166             | -0.05 | 0.31   |

| Mean (SD) change from baseline to last visit |                    |       |       |                   |       |       |                 |       |       |                 |       |       |
|----------------------------------------------|--------------------|-------|-------|-------------------|-------|-------|-----------------|-------|-------|-----------------|-------|-------|
| Assessment                                   | Placebo<br>(n=184) |       |       | Brexipiprazole    |       |       |                 |       |       |                 |       |       |
|                                              | n                  | Mean  | SD    | 0.25 mg<br>(n=90) |       |       | 2 mg<br>(n=182) |       |       | 4 mg<br>(n=180) |       |       |
|                                              | n                  | Mean  | SD    | n                 | Mean  | SD    | n               | Mean  | SD    | n               | Mean  | SD    |
| White blood cell, thousands/ $\mu$ L         | 166                | -0.12 | 1.94  | 82                | 0.06  | 1.77  | 172             | 0.22  | 1.94  | 166             | -0.01 | 1.84  |
| Platelets, thousands/ $\mu$ L                | 165                | -4.55 | 49.71 | 82                | -5.82 | 49.17 | 172             | -6.09 | 56.02 | 166             | -7.92 | 48.57 |

ALT, alanine aminotransferase; APTT, activated partial thromboplastin time; AST, aspartate aminotransferase; CPK, creatinine phosphokinase; HbA1c, hemoglobin A1c; INR, international normalized ratio; PTT, partial thromboplastin time.

\*There were no statistically significant differences between treatment groups.

**Figure S1.** Study design

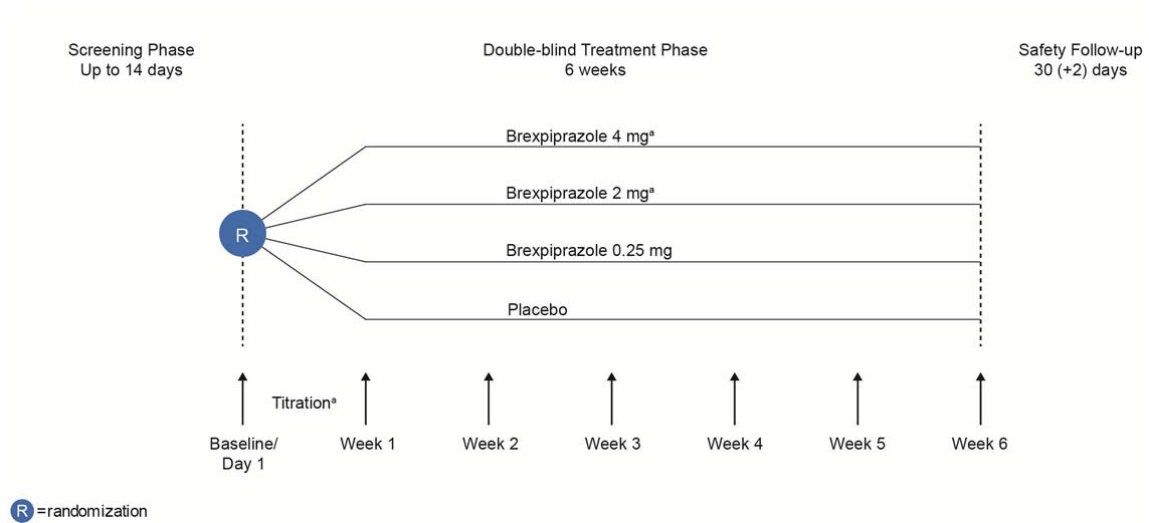

<sup>a</sup>Titration to assigned dose from baseline to the week 1 visit for patients randomized to brexpiprazole 2 mg or 4 mg. Days 1–4: 1 mg/day; days 5–7: 2 mg/day.

Screening phase included washout from previous antipsychotics ( $\geq 7$  days) and prohibited concomitant medications. Concomitant medication disallowed during the study included all psychotropic agents (including antipsychotics, antidepressants and mood stabilizers), benzodiazepines (apart from specific use as rescue therapy), non-benzodiazepine sleep medications (apart from limited use for treatment of insomnia), antihistamines (except for loratadine and cetirizine), varenicline, vitamins, nutritional supplements, non-prescription herbal preparations, CYP2D6 inhibitors, and CYP3A4 inhibitors and inducers.

Patients were hospitalized during the screening and double-blind treatment phases, but were allowed day passes during weeks 3–6 if sufficiently stable.

**Figure S2.** Patient disposition

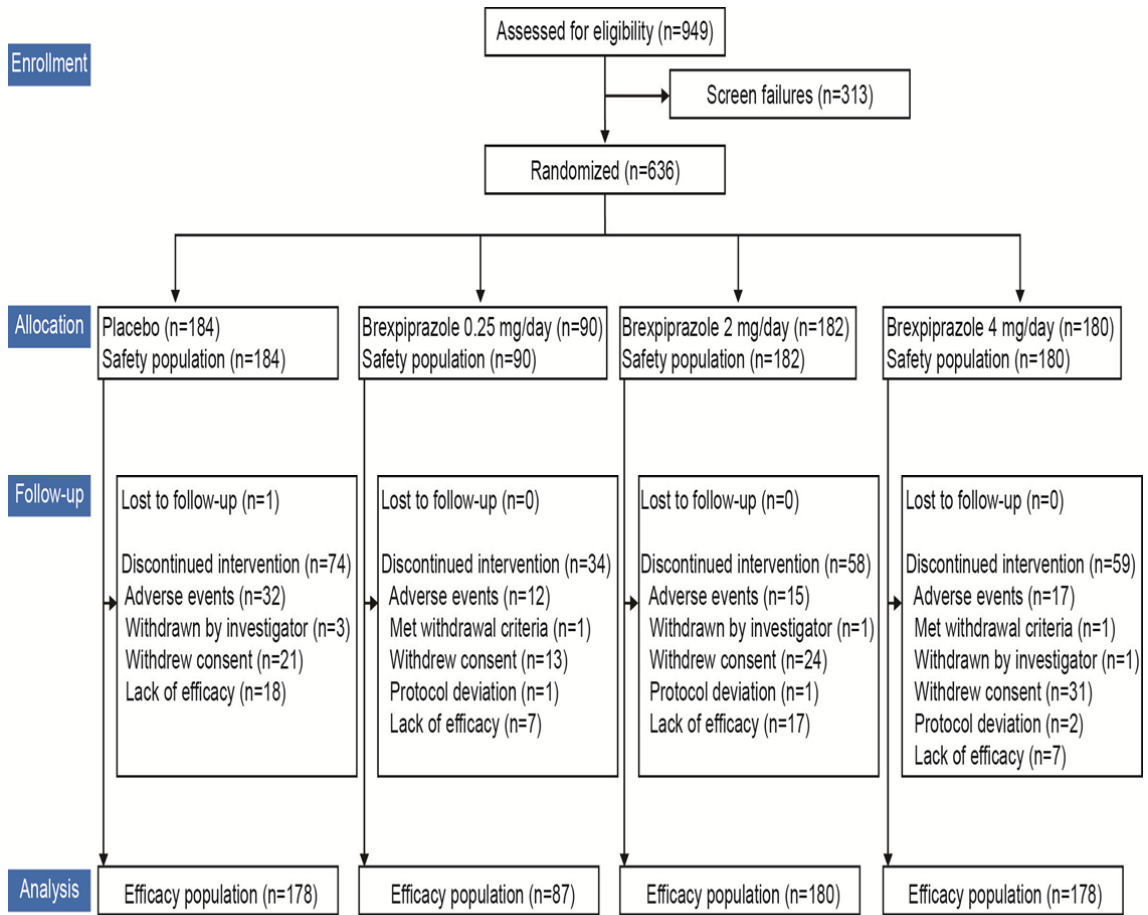

Supplement: appi.ajp.2015.14101275.ds001.pdf [file appi.ajp.2015.14101275.ds001.pdf]
